# Supplementary material for: Optimization of a Novel Non-invasive Oral Sampling Technique for Zoonotic Pathogen Surveillance in Nonhuman Primates
Source: PubMed Central journal article supplement (PMC4457869; doi:10.1371/journal.pntd.0003813), 2015-06-05

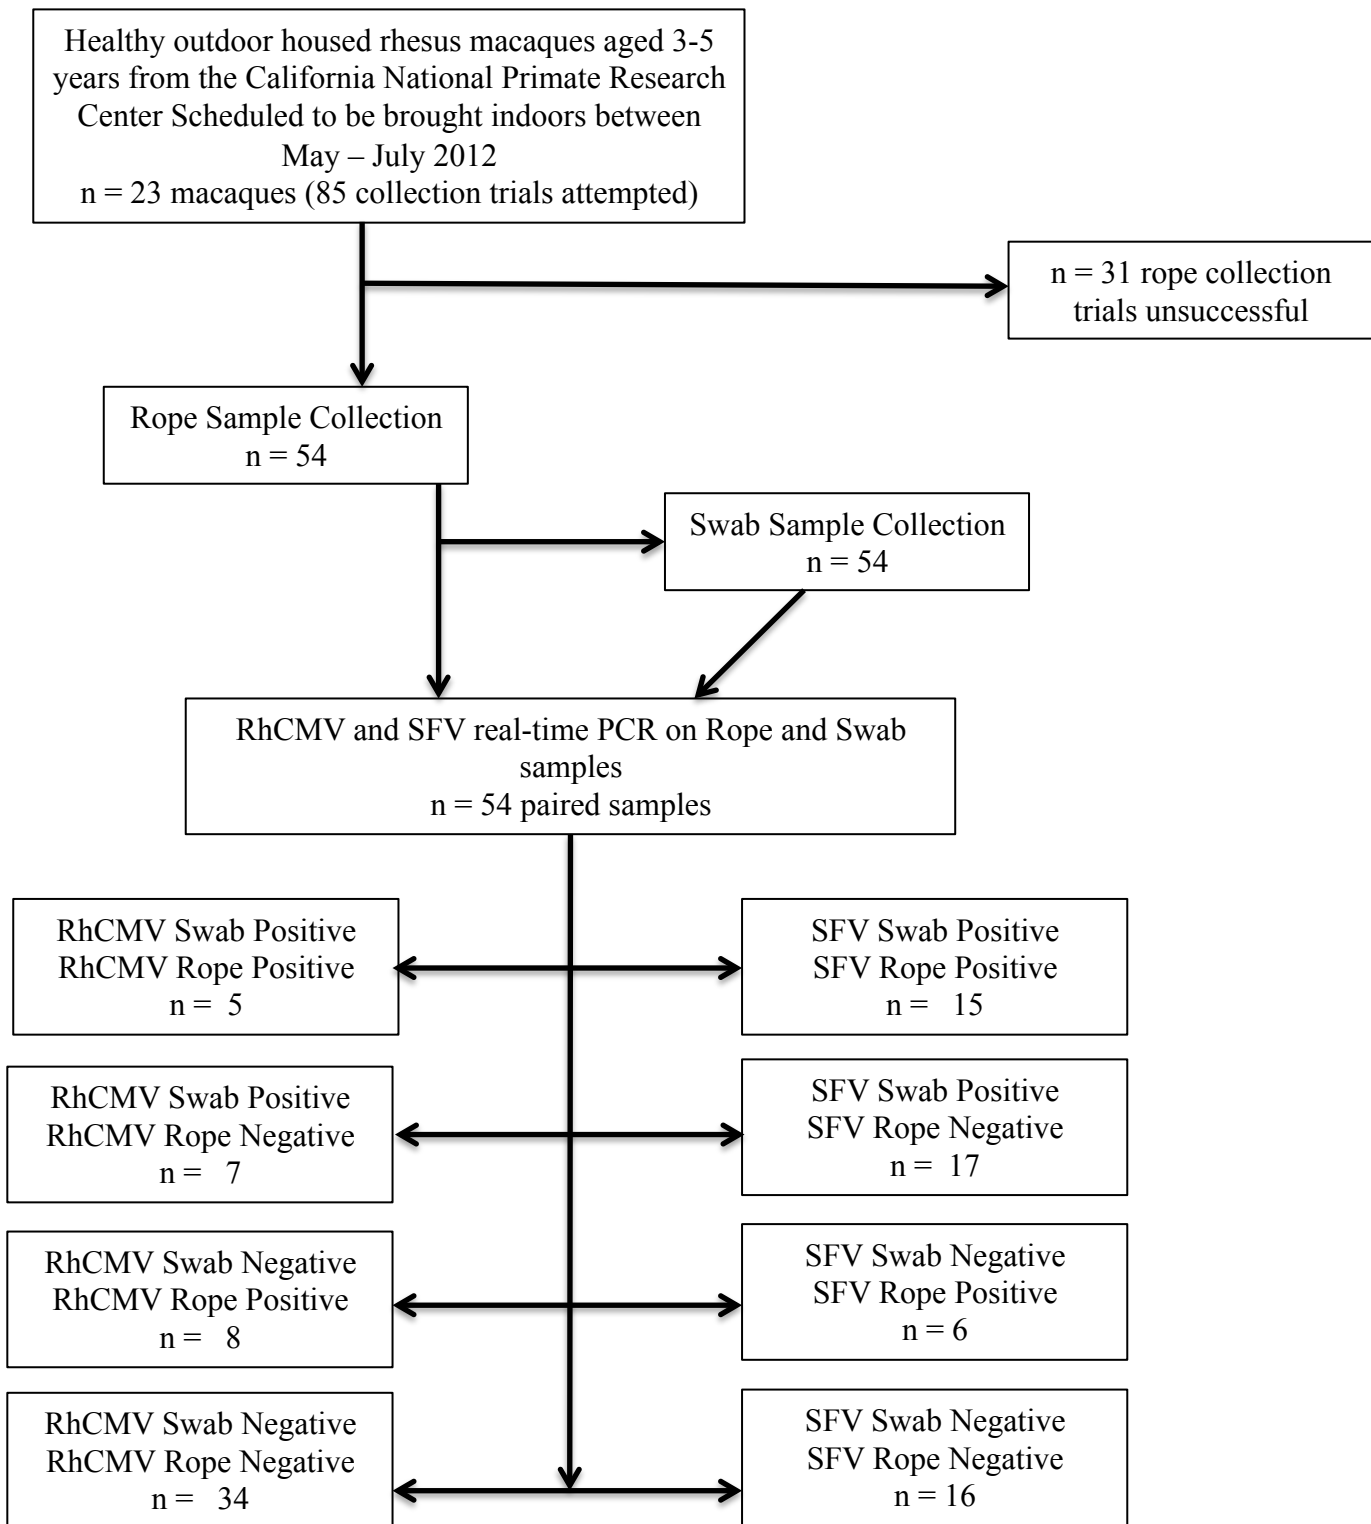

Supplement: pntd.0003813.s002.pdf [file pntd.0003813.s002.pdf]
